# Supplementary material for: The essential role of osteoclast-derived exosomes in magnetic nanoparticle-infiltrated hydroxyapatite scaffold modulated osteoblast proliferation in an osteoporosis model
Source: Royal Society of Chemistry journal article supplement (doi:10.1039/d0nr00867b), 2020-01-01
Supplement: d0nr00867b1.pdf [file d0nr00867b1.pdf]

## Supplementary Information

### **The essential role of osteoclast-derived exosomes in magnetic nanoparticles-infiltrated hydroxyapatite scaffold modulated osteoblast proliferation in osteoporosis model**

*Yue Zhu, Zhiyu Li, Yujia Zhang, Fang Lan, Jing He\* and Yao Wu\**

National Engineering Research Center for Biomaterials, Sichuan University, Chengdu, Sichuan 610064, P.R. China

Corresponding Author:

\*E-mail: jinghe30@scu.edu.cn

\*E-mail: wuyao@scu.edu.cn

## 1 Experimental detail:

### 3 Preparation of the MHA scaffold

4 The MHA scaffolds were prepared according to the previous method reported in our previous paper <sup>1-3</sup>. The  
5 Fe<sub>3</sub>O<sub>4</sub> nanoparticles were first synthesized using thermal decomposition. Briefly, 1.45 g iron (III) acetylacetonate,  
6 5.376g 1, 2- hexadecanediol, 4.8 mL oleylamine and 5.8 mL oleic acid were dissolved in 50 mL benzyl ether. The  
7 mixture solution was heated to 200 °C for 2 h, and then refluxed at 280 °C for 1 h with a nitrogen protection  
8 atmosphere before being allowed to cool to room temperature. Then the black suspension was washed with ethanol  
9 for several times and centrifuged for 5 min at 3500 rpm, the supernatant was removed and the black sediment was  
10 dispersed in n-hexane. In order to remove all undispersed residues, the black dispersion liquid was centrifuged for  
11 10 min at 8000 rpm. After discarding the precipitation, the black dispersion of n-hexane was precipitated by  
12 ethanol, and then centrifuged for 5 min at 3500 rpm once more to remove the ethanol solvent. Finally, the black  
13 MNPs were re-dispersed in n-hexane and stored at 4°C. In order to prepare the MHA scaffolds, HA scaffolds (Φ  
14 14 mm x 2 mm) were immersed in the 10.0 wt% Fe<sub>3</sub>O<sub>4</sub> hexane colloid solution for 24 h. The Fe<sub>3</sub>O<sub>4</sub> nanoparticles  
15 were infiltrated into the pores of the scaffolds by capillary force. Finally, the MHA scaffolds were vacuum-dried  
16 overnight to volatilize the hexane completely <sup>1</sup>. The characteristics of MHA scaffolds were analyzed by vibrating  
17 sample magnetometry (VSM) and scanning electron microscopy (SEM). The particle size and magnetic  
18 performance of Fe<sub>3</sub>O<sub>4</sub> nanoparticles were analyzed by dynamic light scattering (DLS) and VSM.

### 19 Animal model of osteoporosis

20 The housing and all procedures involving animal experiments were performed according to the guide  
21 for the Care and Use of Laboratory Animals published by the Chinese National Academy of Sciences. All  
22 animal experiments were approved by the Institutional Animal Care and Use Committee (IACUC) of  
23 Sichuan University and performed at the National Engineering Research Centre for Biomaterials (Sichuan  
24 University, China). Twelve female Sprague-Dawley (SD) rats at the age of 3 months (240-300 g weight,  
25 Chengdu Dossy experimental Animals Co., LTD.) were subjected to bilateral ovariectomy (OVX) <sup>4</sup>.  
26 Micro-computed tomography (Micro-CT) analysis was used to assess bone micro-architectural changes  
27 after OVX for three months. Afterward, the OVX rats were used for the isolation of primary osteoblastic and  
28 osteoclastic cells.

### 29 Primary osteoblastic cell harvesting and culture

30 The isolation of primary osteoblastic cells was performed according to the protocol from Zhang's group <sup>5</sup>. In  
31 detail, the OVX rats were sacrificed and the tibia bones were obtained after scraped thoroughly to remove the soft  
32 tissues and then were cut into small explants (1-2 mm in length). After discarded the bone marrow, the explants  
33 were washed repeatedly by antibiotic-antimycotic solution to remove the attached bone marrow. The clean bone  
34 explants were placed in Dulbecco's modified culture medium containing 10% fetal bovine serum, 1x antibiotic  
35 solution and 100 μM L-ascorbate at 37 °C under a humidified incubator of 5% CO<sub>2</sub>. The medium was changed  
36 every 3 days. During the culture time, osteoblastic cells were continuously exuded from the surface of bone  
37 explants and then were attached to the culture plate. Cells within five passage were used in this study.

### 38 Primary osteoclastic cell harvesting and culture

39 Bone marrow monocytes were isolated freshly according to a standard protocol described in previous  
40 researches <sup>6, 7</sup>. Simply, the femur and tibia of OVX rats were dissected and the bone marrow was completely  
41 flushed by cell culture medium. After centrifuging for 5 minutes at 1200 rpm/min, the cells were suspended in 5  
42 mL red blood cell lysate to remove red blood cells. Then, the cells were washed with PBS and seeded in cell  
43 culture dish in DMEM complete medium containing 10 ng/mL M-CSF. After the cells were cultured for 24 h, the  
44 non-adherent dependent monocytes were collected. 50 ng/mL M-CSF and 50 ng/mL RANKL were used to

1 stimulate monocytes differentiation towards osteoclasts. After 7 days, the differentiated cells were fixed and  
2 stained by tartrate-resistant acid phosphatase (TRAP activity) following the kit protocol.

### 3 **The proliferation of osteoblast in cell co-culture system**

4 Osteoblasts with the number of  $5 \times 10^3$  were cultured on the HA or MHA scaffolds embedded on the bottom of the  
5 Transwell plates, and osteoclasts with the number of  $5 \times 10^5$  were cultured on the Transwell inserts. At 1, 4, and 7 days,  
6 osteoblast proliferation was detected by CCK-8 count kit, respectively. Cell morphology was observed at 7 days  
7 by laser scanning confocal microscope.

### 8 **Secretome identification by liquid chromatography mass spectrometry** 9 **(LC/MS/MS)**

10 After co-culturing for 7 days, the secretion proteins from cells stimulated with HA and MHA scaffolds were  
11 collected, respectively. The sodium dodecyl sulfate polyacrylamide gel electrophoresis (SDS-PAGE) and LC-  
12 MS/MS were selected for protein identification.

### 13 **Isolation and purification of exosomes by ultracentrifugation**

14 After co-culturing for 7 days, the cell medium was discarded. The cells were washed by PBS for three times  
15 and cultured in serum-free medium for another 24 h. Then, the medium was collected and respectively centrifuged  
16 at 300g (10 min), 3000g (20 min) to remove the cells and cellular debris. Afterwards, the supernatant was  
17 centrifuged at 10000g in a 29.9 mL tube to discard large extracellular vesicles and filtered using a 0.22  $\mu$ m syringe  
18 filter. Following a further ultracentrifugation at 100000g for 2 h to discard the supernatant, the exosomes were  
19 present in the bottom of the tube. Finally, the exosomes were dispersed in PBS and centrifuged at 100000g for 2 h  
20 once more to concentrate. All centrifugation steps were performed at 4 °C, and the obtained exosomes were stored  
21 at -80 °C for further use.

### 22 **Nanoparticle tracking analysis**

23 The obtained exosomes were diluted at a ratio of 1:250,000 in deionized water. Then, the 3-5 mL exosomal  
24 suspension were injected into the Zeta View sample cell to achieve the size distribution and the concentration of  
25 the exosomes were measured.

### 26 **Transmission electron microscope analysis**

27 10  $\mu$ L of the obtained exosome sample was adsorbed onto a copper grid to maintain at room temperature for  
28 several minutes, and the sample was stained by 2% uranyl acetate for 3 min under dark conditions. The  
29 morphology of exosomes was detected by transmission electron microscope.

### 30 **Western-blot analysis**

31 The exosome sample was mixed with 5 x loading buffer and boiled for 10 min at 99 °C. The denatured  
32 proteins sample was loaded onto 12% SDS-PAGE gel for separation. After electrophoresis, the proteins were  
33 transferred to a poly (vinylidene fluoride) (PVDF) membrane for 2 h. After the PVDF membrane were blocked for  
34 1 h at room temperature in 5% non-fat milk solution, the membrane was incubated with the primary antibodies  
35 overnight at 4 °C. After washing with PBST for three times, the membrane was incubated in secondary antibodies  
36 (1:2000) for 1 h. Finally, the blot was detected through an enhanced chemi-luminescence. The all primary  
37 antibodies ( $\beta$ -actin, CD9, CD63, HSP70 and ALIX purchased from Beyotime Biotechnology, System Biosciences  
38 and Abcam) were diluted at the ratio of 1:1000.

### 39 **Osteoblast cellular uptake of exosomes**

40 Osteoclast-like exosomes were collected according to the above methods. 10  $\mu$ L of the obtained exosomes  
41 were added to Diluent C solution to make up the volume to 250  $\mu$ L. Then, 1  $\mu$ L PKH26 was added to 249  $\mu$ L  
42 Diluent C solution to make up the volume to 250  $\mu$ L and mixed gently. The two dilutions were mixed in a new 2  
43 mL tube and incubated for 5 min at 25 °C in a dark place. 500  $\mu$ L of stopping solution was added to stop the  
44 reaction. Then, the mixture was purified by ultracentrifugation at 100000g for 2 h. The PKH26-labeled exosomes

were added to the osteoblasts cultured on HA and MHA scaffolds, respectively. After being co-cultured 6 h, the cells were fixed with 4% paraformaldehyde for 30 min and stained with DAPI solution for 10 min at room-temperature in dark place. Finally, the cellular uptake of exosomes was detected by CLSM.

#### Statistical analysis

All experiments were conducted three times to ensure reproducibility. All dates were presented as means values  $\pm$  standard deviation for  $n = 3$ . Differences between experimental groups were assessed by one-way analysis of variance (ANOVA) with Bonferoni's method. Probability value ( $p$ )  $< 0.05$  was taken as showing statistically significant.

#### Supporting Figures:

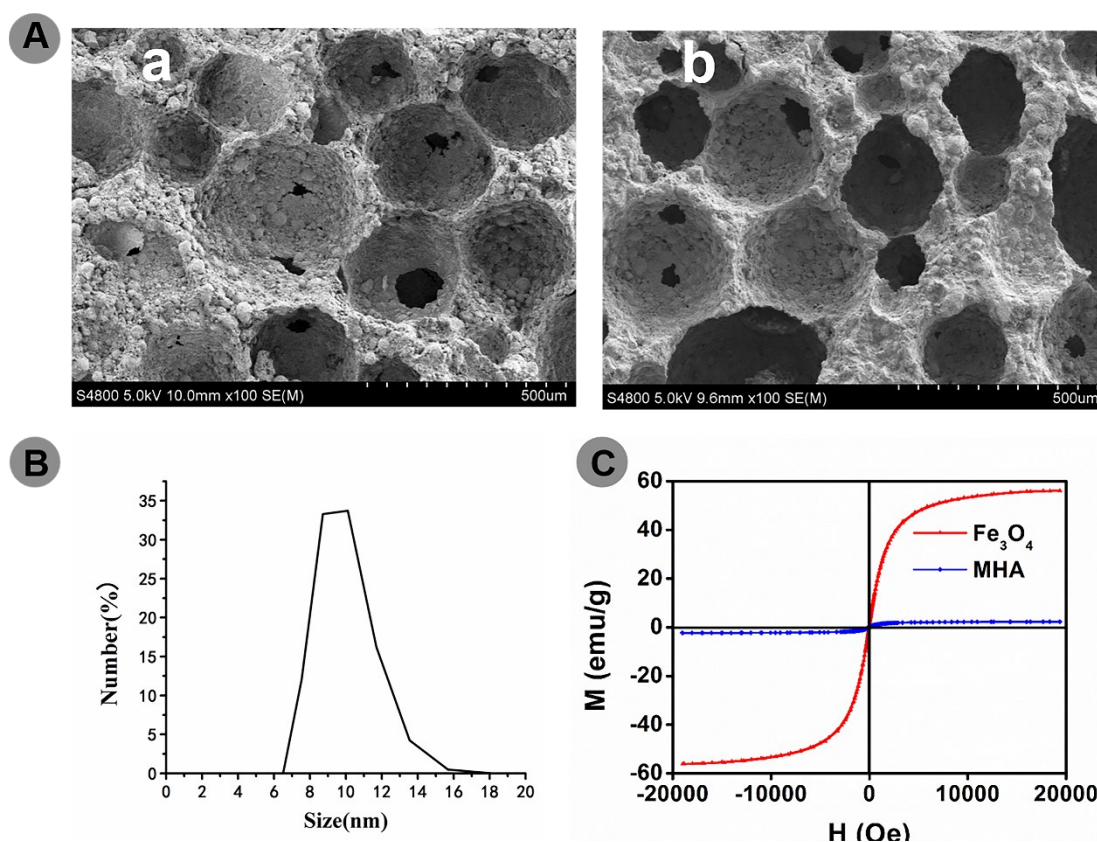

**Fig. S1.** (A) The morphology of HA and MHA scaffolds, SEM micrographs showed that MHA scaffolds (b) exhibited macro- and microporosity and good interconnectivity, which was similar with HA scaffold (a). (B) The Particle size of  $\text{Fe}_3\text{O}_4$  nanoparticles measured by DLS; (C) Magnetization curve of MHA scaffold and  $\text{Fe}_3\text{O}_4$  nanoparticles, MHA scaffold exhibited surperparamagnetism at room temperature and the saturation magnetization of MHA scaffold were 2.31 emu/g.

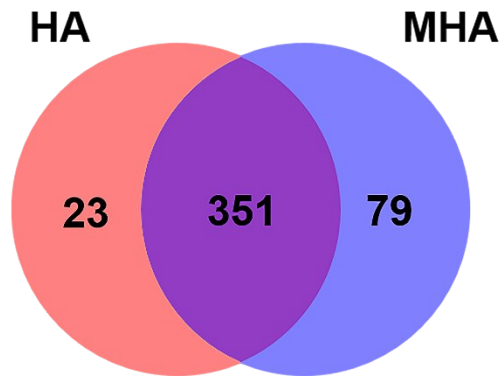

1  
2 **Fig. S2.** Venn diagrams reports the number of unique proteins identified in the HA and MHA scaffolds and their  
3 respective overlap.

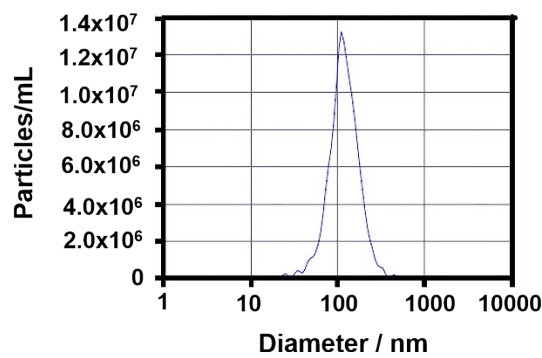

5  
6 **Fig. S3.** Nanoparticle tracking analysis for the size and concentration of the exosomes from osteoclast-like cells.

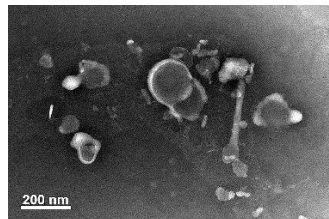

9  
10 **Fig. S4.** Transmission electron microscope images of the exosomes from osteoclast-like cells.

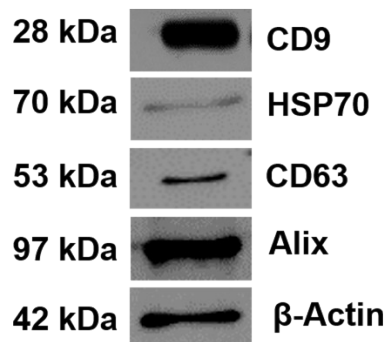

12  
13 **Fig. S5.** Western-blotting analysis of specific proteins obtained from osteoclast-like cells.

1 **Table S1.** List of the proteins related to Ca<sup>2+</sup>.

| Protein IDs | Names    | Up-regulation or Down-regulation |
|-------------|----------|----------------------------------|
| Q71SA3      | Thbs1    | Down                             |
| A0A096P6L8  | Fn1      | Down                             |
| A0A0G2JWK0  | Itgb3    | Up                               |
| F1M7X3      | Cdh13    | Down                             |
| P02680      | Fgg      | Down                             |
| P0DP31      | Calm3    | Up                               |
| P14480      | Fgb      | Up                               |
| P18418      | Calr     | Up                               |
| P20961      | Serpine1 | Up                               |
| P31044      | Pebp1    | Up                               |
| P54311      | Gnb1     | Down                             |
| Q07936      | Anxa2    | Up                               |
| Q3T1J1      | Eif5a    | Down                             |
| Q62658      | Fkbp1a   | Up                               |
| Q6AYC4      | Capg     | Up                               |
| Q91ZN1      | Coro1a   | Up                               |

2

3 **Table S2.** List of the proteins related to Rho kinase.

| Protein IDs | Names    | Up-regulation or Down-regulation |
|-------------|----------|----------------------------------|
| P61589      | Rhoa     | Down                             |
| P82995      | Hsp90aa1 | Up                               |
| D3ZMS5      | Tiam2    | Down                             |
| Q5U1Y2      | Rac2     | Up                               |
| Q5XI73      | Arhgdia  | Up                               |
| Q8CFN2      | Cdc42    | Up                               |

4

5 **Table S3.** List of the proteins related to reactive oxygen species.

| Protein IDs | Names    | Up-regulation or Down-regulation |
|-------------|----------|----------------------------------|
| A0A0G2JSH9  | Prdx2    | Down                             |
| A0A0G2JSS8  | Prdx5    | Up                               |
| A0A0G2K531  | Gpx3     | Up                               |
| A0A0G2K737  | Txn1l    | Down                             |
| A0A0H2UHM5  | Pdia3    | Up                               |
| B2GUV5      | Atp6v1g1 | Down                             |
| B2RZ27      | Sh3bgrl3 | Down                             |
| F1M983      | Cfh      | Down                             |
| O35244      | Prdx6    | Down                             |
| P04785      | P4hb     | Up                               |
| P05197      | Eef2     | Up                               |
| P05982      | Nqo1     | Down                             |
| P11232      | Txn      | Down                             |
| P14841      | Cst3     | Down                             |

|            |         |      |
|------------|---------|------|
| P07895     | Sod2    | Down |
| Q91YB6     | Cfh     | Down |
| Q99J86     | Atrn    | Down |
| Q9Z0V5     | Prdx4   | Up   |
| Q3KR76     | Plau    | Up   |
| A0A0A0MY09 | Hsp90b1 | Down |
| P05065     | Aldoa   | Up   |
| P11980     | Pkm     | Down |

1

2 **Table S4.** List of the proteins related to endopeptidase.

| Protein IDs | Names    | Up-regulation or Down-regulation |
|-------------|----------|----------------------------------|
| A0A0H2UHM3  | Hp       | Down                             |
| B0BNA5      | Cotl1    | Up                               |
| B2RYM3      | Itih1    | Up                               |
| G3V8U9      | Psmb4    | Down                             |
| M0RBJ7      | C3       | Down                             |
| P01041      | Cstb     | Up                               |
| P06238      | A2m      | Down                             |
| P19804      | Nme2     | Up                               |
| P25113      | Pgam1    | Up                               |
| P47942      | Dpysl2   | Down                             |
| P61983      | Ywhag    | Down                             |
| Q01177      | Plg      | Down                             |
| Q641Z7      | Smpdl3a  | Down                             |
| Q6MG90      | C4b      | Down                             |
| Q6P6Q5      | App      | Down                             |
| Q6P6T6      | Ctsd     | Down                             |
| Q8CIP8      | C2       | Up                               |
| Q8CJH4      | rGM2AP   | Up                               |
| A0A0U1RRP9  | Cfb      | Up                               |
| B2RYC9      | Gba      | Down                             |
| D3ZYK8      | Mmp9     | Up                               |
| O88767      | Park7    | Up                               |
| Q6IN22      | Ctsb     | Down                             |
| I2FHN3      | CatL     | Down                             |
| P30121      | Timp2    | Down                             |
| Q5M7T5      | Serpinc1 | Down                             |
| Q6P734      | Serping1 | Up                               |
| Q80ZA3      | Serpinf1 | Down                             |
| Q9EPB1      | Dpp7     | Down                             |

3

4 **Table S5.** List of the proteins related to ubiquitination.

| Protein IDs | Names | Up-regulation or Down-regulation |
|-------------|-------|----------------------------------|
| P07335      | Ckb   | Up                               |

|        |          |      |
|--------|----------|------|
| P62260 | Ywhae    | Down |
| P63259 | Actg1    | Down |
| P69897 | Tubb5    | Up   |
| Q5XIM9 | Cct2     | Down |
| Q6P9V9 | Tuba1b   | Down |
| P18420 | Psma1    | Up   |
| P34058 | Hsp90ab1 | Up   |
| P46462 | Vcp      | Up   |
| P60901 | Psma6    | Down |
| Q6P9V6 | Psma5    | Down |
| Q9JI92 | Sdcbp    | Down |

1

2 **Table S6.** List of the proteins related to ATP.

| <b>Protein IDs</b> | <b>Names</b> | <b>Up-regulation or Down-regulation</b> |
|--------------------|--------------|-----------------------------------------|
| A0A0G2K1C0         | Actr3        | Down                                    |
| D3ZRN3             | Actb12       | Down                                    |
| D4ACB8             | Cct8         | Up                                      |
| F1LRV4             | Hspa4        | Down                                    |
| G3V6P7             | Myh9         | Up                                      |
| P07335             | Ckb          | Up                                      |
| P16617             | Pgk1         | Up                                      |
| P34058             | Hsp90ab1     | Up                                      |
| P50503             | St13         | Up                                      |
| P60711             | Actb         | Down                                    |
| P63259             | Actg1        | Down                                    |
| P68136             | Acta1        | Down                                    |
| P82995             | Hsp90aa1     | Up                                      |
| Q5BJY2             | Cct6a        | Down                                    |
| Q5M7U6             | Actr2        | Down                                    |
| Q5XIM9             | Cct2         | Down                                    |
| Q6AXQ3             | Yes1         | Down                                    |
| Q6P3V8             | Eif4a1       | Up                                      |
| Q7TPB1             | Cct4         | Up                                      |
| D4A133             | Atp6v1a      | Down                                    |
| D4A8F2             | Rsu1         | Up                                      |
| F1LP05             | Atp5f1a      | Down                                    |
| G3V6D3             | Atp5f1b      | Down                                    |
| P04797             | Gapdh        | Down                                    |
| P06761             | Hspa5        | Down                                    |
| P19804             | Nme2         | Up                                      |
| P19945             | Rplp0        | Up                                      |
| P50399             | Gdi2         | Up                                      |
| Q04679             | Fxyd2        | Down                                    |
| Q62636             | Rap1b        | Down                                    |



|        |       |      |
|--------|-------|------|
| Q6NYB7 | Rab1A | Down |
|--------|-------|------|

1

2 **Table S7.** List of the proteins related to endocytosis.

| Protein IDs | Names  | Up-regulation or Down-regulation |
|-------------|--------|----------------------------------|
| F8V328      | Rab8a  | Down                             |
| P02680      | Fgg    | Down                             |
| P0DP31      | Calm3  | Up                               |
| P14480      | Fgb    | Up                               |
| P47942      | Dpysl2 | Down                             |
| P63259      | Actg1  | Down                             |
| Q07936      | Anxa2  | Up                               |
| Q08163      | Cap1   | Up                               |
| P07151      | B2m    | Up                               |

3

4 **Table S8.** List of the proteins related to phagocytosis.

| Protein IDs | Names | Up-regulation or Down-regulation |
|-------------|-------|----------------------------------|
| Q8CFN2      | Cdc42 | Up                               |
| P18418      | Calr  | Up                               |
| Q68FP1      | Gsn   | Down                             |

5

6 **Table S9.** List of the proteins related to membrane fusion.

| Protein IDs | Names   | Up-regulation or Down-regulation |
|-------------|---------|----------------------------------|
| P50399      | Gdi2    | Up                               |
| Q9JI92      | Sdcbp   | Down                             |
| A0A0G2JWK0  | Itgb3   | Up                               |
| D3ZRN3      | Actbl2  | Down                             |
| D3ZQ45      | Dsg1    | Down                             |
| D4A8G5      | Tgfbi   | Up                               |
| F1LMV6      | Dsp     | Up                               |
| F1M7X3      | Cdh13   | Down                             |
| G3V6D3      | Atp5f1b | Down                             |
| P14841      | Cst3    | Down                             |
| P60711      | Actb    | Down                             |
| P45592      | Cfl1    | Up                               |
| P38983      | Rpsa    | Down                             |
| P61589      | Rhoa    | Down                             |
| Q3KR76      | Plau    | Up                               |
| Q71SA3      | Thbs1   | Down                             |
| R9PXU6      | Vcl     | Up                               |
| A1L1J8      | Rab5b   | Down                             |
| B0BMW0      | Rab14   | Down                             |
| Q6NYB7      | Rab1A   | Down                             |
| Q5RKJ9      | Rab10   | Down                             |
| F1LP82      | Rab2a   | Down                             |

|            |        |      |
|------------|--------|------|
| A0A0G2K930 | Rab7a  | Up   |
| A0A0G2JZR4 | Rab11b | Down |
| Q91ZN1     | Coro1a | Up   |
| P68370     | Tuba1a | Down |
| P69897     | Tubb5  | Up   |
| Q04679     | Fxyd2  | Down |
| Q62636     | Rap1b  | Down |
| Q5M7U6     | Actr2  | Down |
| Q68FP1     | Gsn    | Down |
| Q6P6Q5     | App    | Down |

1

2 **Table S10.** List of the proteins related to cytoskeleton.

| <b>Protein IDs</b> | <b>Names</b> | <b>Up-regulation or Down-regulation</b> |
|--------------------|--------------|-----------------------------------------|
| G3V8C3             | Vim          | Down                                    |
| A0A0G2K013         | Actn4        | Down                                    |
| A0A1W2Q6E9         | Msn          | Up                                      |
| G3V6P7             | Myh9         | Up                                      |
| P05197             | Eef2         | Up                                      |
| P05942             | S100a4       | Up                                      |
| P61983             | Ywhag        | Down                                    |
| Q07936             | Anxa2        | Up                                      |
| A0A0G2K1C0         | Actr3        | Down                                    |
| A0A0G2K2J1         | Arpc2        | Down                                    |
| B0BNA5             | Cotl1        | Up                                      |
| B2GUZ5             | Capza1       | Up                                      |
| B2GV73             | Arpc3        | Down                                    |
| C0JPT7             | Flna         | Down                                    |
| D3ZRX9             | Cnn2         | Down                                    |
| F1LMV6             | Dsp          | Up                                      |
| G3V7C6             | Tubb4b       | Up                                      |
| G3V908             | Kb15         | Down                                    |
| O88656             | Arpc1b       | Down                                    |
| P04797             | Gapdh        | Down                                    |
| P09495             | Tpm4         | Down                                    |
| P18418             | Calr         | Up                                      |
| P45592             | Cfl1         | Up                                      |
| P47942             | Dpysl2       | Down                                    |
| P61589             | Rhoa         | Down                                    |
| P63259             | Actg1        | Down                                    |
| P68136             | Acta1        | Down                                    |
| P68370             | Tuba1a       | Down                                    |
| P69897             | Tubb5        | Up                                      |
| P85108             | Tubb2a       | Up                                      |
| Q08163             | Cap1         | Up                                      |

|        |        |      |
|--------|--------|------|
| Q3T1K5 | Capza2 | Up   |
| Q5M7U6 | Actr2  | Down |
| Q5RKI0 | Wdr1   | Down |
| Q5U1Y2 | Rac2   | Up   |
| Q5XI32 | Capzb  | Down |
| Q5XI38 | Lcp1   | Up   |
| Q5XIF6 | Tuba4a | Up   |
| Q63610 | Tpm3   | Up   |
| Q68FP1 | Gsn    | Down |
| Q6AYC4 | Capg   | Up   |
| Q6GMN8 | Actn1  | Down |
| Q6P9V9 | Tuba1b | Down |
| Q7M0E3 | Dstn   | Up   |
| Q8CFN2 | Cdc42  | Up   |
| Q91ZN1 | Coro1a | Up   |
| Q9JI92 | Sdcbp  | Down |
| R9PXU6 | Vcl    | Up   |

1

2 **Table S11.** List of the proteins related to signal.

| Protein IDs | Names  | Up-regulation or Down-regulation |
|-------------|--------|----------------------------------|
| A0A0G2JSS8  | Prdx5  | Up                               |
| A1L114      | Fga    | Down                             |
| P45592      | Cfl1   | Up                               |
| Q99J86      | Atrn   | Down                             |
| A0A0G2JSH9  | Prdx2  | Down                             |
| A0A0G2JWK0  | Itgb3  | Up                               |
| A0A0H2UHM3  | Hp     | Down                             |
| A0A0H2UHM5  | Pdia3  | Up                               |
| B0BMW0      | Rab14  | Down                             |
| A1L1J8      | Rab5b  | Down                             |
| B2LYI9      | Tnc    | Down                             |
| B2RYC9      | Gba    | Down                             |
| C0JPT7      | Flna   | Down                             |
| D3ZMS5      | Tiam2  | Down                             |
| D3ZYK8      | Mmp9   | Up                               |
| G3V8C3      | Vim    | Down                             |
| G3V8U9      | Psmb4  | Down                             |
| O88767      | Park7  | Up                               |
| P02680      | Fgg    | Down                             |
| P04785      | P4hb   | Up                               |
| P05942      | S100a4 | Up                               |
| P06761      | Hspa5  | Down                             |
| P07895      | Sod2   | Down                             |
| P07943      | Akr1b1 | Down                             |

|        |          |      |
|--------|----------|------|
| P0DP31 | Calm3    | Up   |
| P14480 | Fgb      | Up   |
| P18418 | Calr     | Up   |
| P19804 | Nme2     | Up   |
| P20059 | Hpx      | Down |
| P30121 | Timp2    | Down |
| P31044 | Pebp1    | Up   |
| P34058 | Hsp90ab1 | Up   |
| P35213 | Ywhab    | Up   |
| P46462 | Vcp      | Up   |
| P50399 | Gdi2     | Up   |
| P54311 | Gnb1     | Down |
| P55053 | Fabp5    | Up   |
| P61589 | Rhoa     | Down |
| P61983 | Ywhag    | Down |
| P62260 | Ywhae    | Down |
| P82995 | Hsp90aa1 | Up   |
| Q3KR76 | Plau     | Up   |
| Q5U1Y2 | Rac2     | Up   |
| Q5XI73 | Arhgdia  | Up   |
| Q62636 | Rap1b    | Down |
| Q62658 | Fkbp1a   | Up   |
| Q68FP1 | Gsn      | Down |
| Q8CFN2 | Cdc42    | Up   |
| Q91ZN1 | Coro1a   | Up   |
| Q9JI92 | Sdcbp    | Down |

1

2 **Table S12.** List of the proteins related to antigen processing and present.

| Protein IDs | Names   | Up-regulation or Down-regulation |
|-------------|---------|----------------------------------|
| Q9JI92      | Sdcbp   | Down                             |
| P46462      | Vcp     | Up                               |
| P69897      | Tubb5   | Up                               |
| A0A0G2K392  | Masp2   | Down                             |
| A0A0U1RRP9  | Cfb     | Up                               |
| A1L1J8      | Rab5b   | Down                             |
| D4A1T6      | C1r     | Down                             |
| F1M983      | Cfh     | Down                             |
| G3V6D3      | Atp5f1b | Down                             |
| G3V7N9      | C1qb    | Down                             |
| M0RBJ7      | C3      | Down                             |
| O88767      | Park7   | Up                               |
| P02680      | Fgg     | Down                             |
| P04785      | P4hb    | Up                               |
| P06238      | A2m     | Down                             |

|        |          |      |
|--------|----------|------|
| P06761 | Hspa5    | Down |
| P07151 | B2m      | Up   |
| P14480 | Fgb      | Up   |
| P18418 | Calr     | Up   |
| P18420 | Psmal1   | Up   |
| P20059 | Hpx      | Down |
| P20961 | Serpine1 | Up   |
| P45592 | Cfl1     | Up   |
| Q01177 | Plg      | Down |
| Q5BKC4 | C9       | Down |
| Q5M7T5 | Serpinc1 | Down |
| Q5RKI0 | Wdr1     | Down |
| Q5RKJ9 | Rab10    | Down |
| Q5XFV4 | Fabp4    | Down |
| Q6GMN4 | Csf1     | Down |
| Q6MG90 | C4b      | Down |
| Q6P734 | Serping1 | Up   |
| Q6P9V9 | Tuba1b   | Down |
| Q71SA3 | Thbs1    | Down |
| Q80ZA3 | Serpinfl | Down |
| Q8CIP8 |          | Up   |
| Q91YB6 | Cfh      | Down |
| Q91ZN1 | Coro1a   | Up   |
| Q99J86 | Atrn     | Down |
| Q9QZK8 | Dnase2   | Down |

1

## 2 Supporting References

- 3 1. Y. Zhu, Q. Yang, M. Yang, X. Zhan, F. Lan, J. He, Z. Gu and Y. Wu, *ACS Nano*, 2017, **11**, 3690-3704.
- 4 2. X. B. Zeng, H. Hu, L. Q. Xie, F. Lan, W. Jiang, Y. Wu and Z. W. Gu, *Int. J. Nanomed.*, 2012, **7**, 3365-3378.
- 5 3. Y. Zhu, P. Jiang, B. Luo, F. Lan, J. He and Y. Wu, *Nanoscale*, 2019, **11**, 6817-6827.
- 6 4. L. Jiang, X. Shen, L. Wei, Q. Zhou and Y. Gao, *J. Oral Pathol. Med.*, 2017, **46**, 398-404.
- 7 5. R. Zhao, P. Xie, K. Zhang, Z. Tang, X. Chen, X. Zhu, Y. Fan, X. Yang and X. Zhang, *Acta Biomater.*, 2017, **59**,
- 8 338-350.
- 9 6. T. Takarada, E. Hinoi, Y. Kambe, K. Sahara, S. Kurokawa, Y. Takahata and Y. Yoneda, *Eur. J. Pharmacol.*,
- 10 2007, **575**, 1-11.
- 11 7. L. Forte, P. Torricelli, E. Boanini, M. Gazzano, K. Rubini, M. Fini and A. Bigi, *Acta Biomater.*, 2016, **32**, 298-
- 12 308.
- 13
